# Supplementary material
Source: publisher figshare collection journal article supplement (https://acs.figshare.com/ndownloader/files/4618780)

*Supplement materials for*

# Atomic Force Microscopy Study of Effect of Pulsed Electric Field on *Staphylococcus* *epidermidis*

Liu Yang,<sup>†</sup> Huimin Li,<sup>‡</sup> Kemin Wang,<sup>†\*</sup> Weihong Tan,<sup>†</sup> Wenjuan Yang,<sup>†</sup> Jing Zheng,<sup>†</sup>

**Figure S1.** The influence of poly-L-lysine concentration on cell immobilization. A, B and C are the topographical images of immobilized bacteria on the ITO-covered glass slide under liquid, with different poly-L-lysine concentration of 0.1mg/mL (A), 0.25mg/mL (B) and 1mg/mL (C).

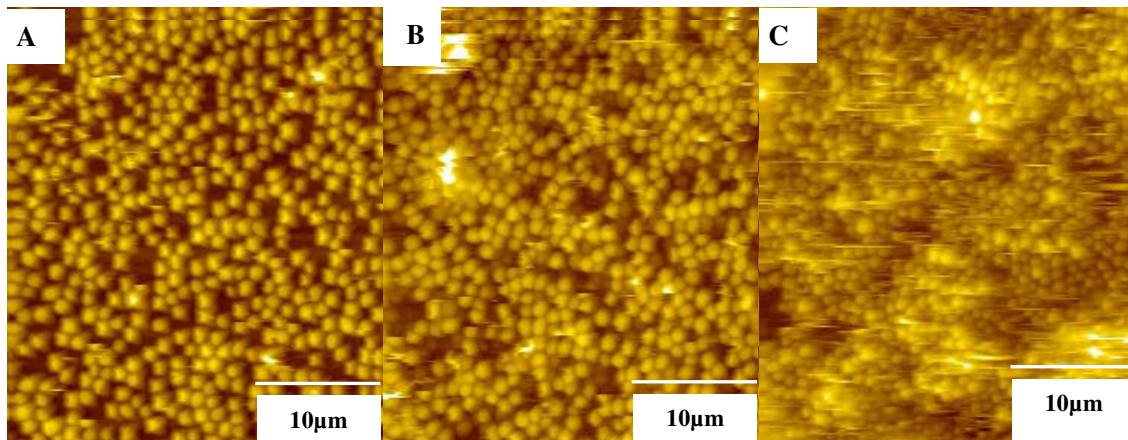

**Figure S2.** The influence of PBS solution on bacterial envelop. A and B are the deflection images of immobilized bacteria on the ITO-covered glass slide, before and after 2 h under PBS.

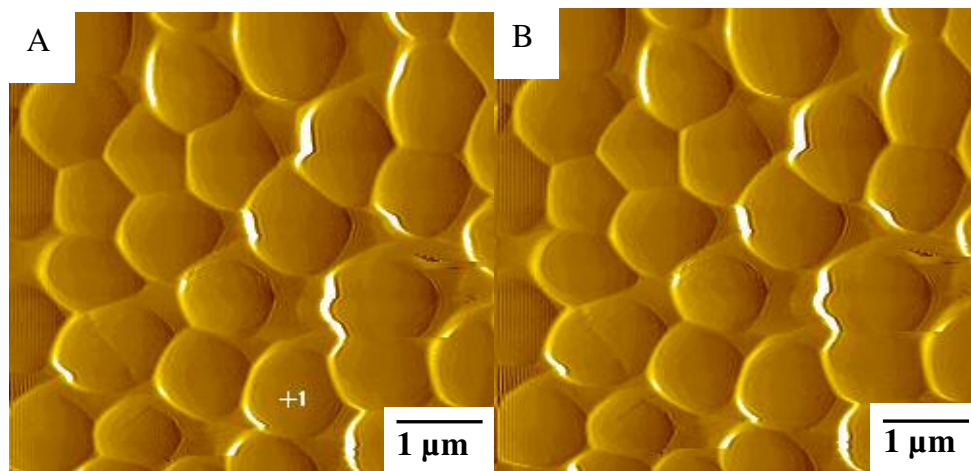

**Figure S3.** The deflection imaging of 0.1 mg/mL poly-L-lysine layer. A-F were obtained under liquid before (A and D) and after 10 (B and E), 20 (C and F) dosages of PEF imposed. A, B and C are large scan area images, while E, F and G are the smaller one. G-I were gotten in air before (G) and after 4 (H) and 6 (I) dosages of PEF, which are clearer than under liquid in gentle surface change. The insets in black square is  $1.5\mu\text{m}\times 1.5\mu\text{m}$ .

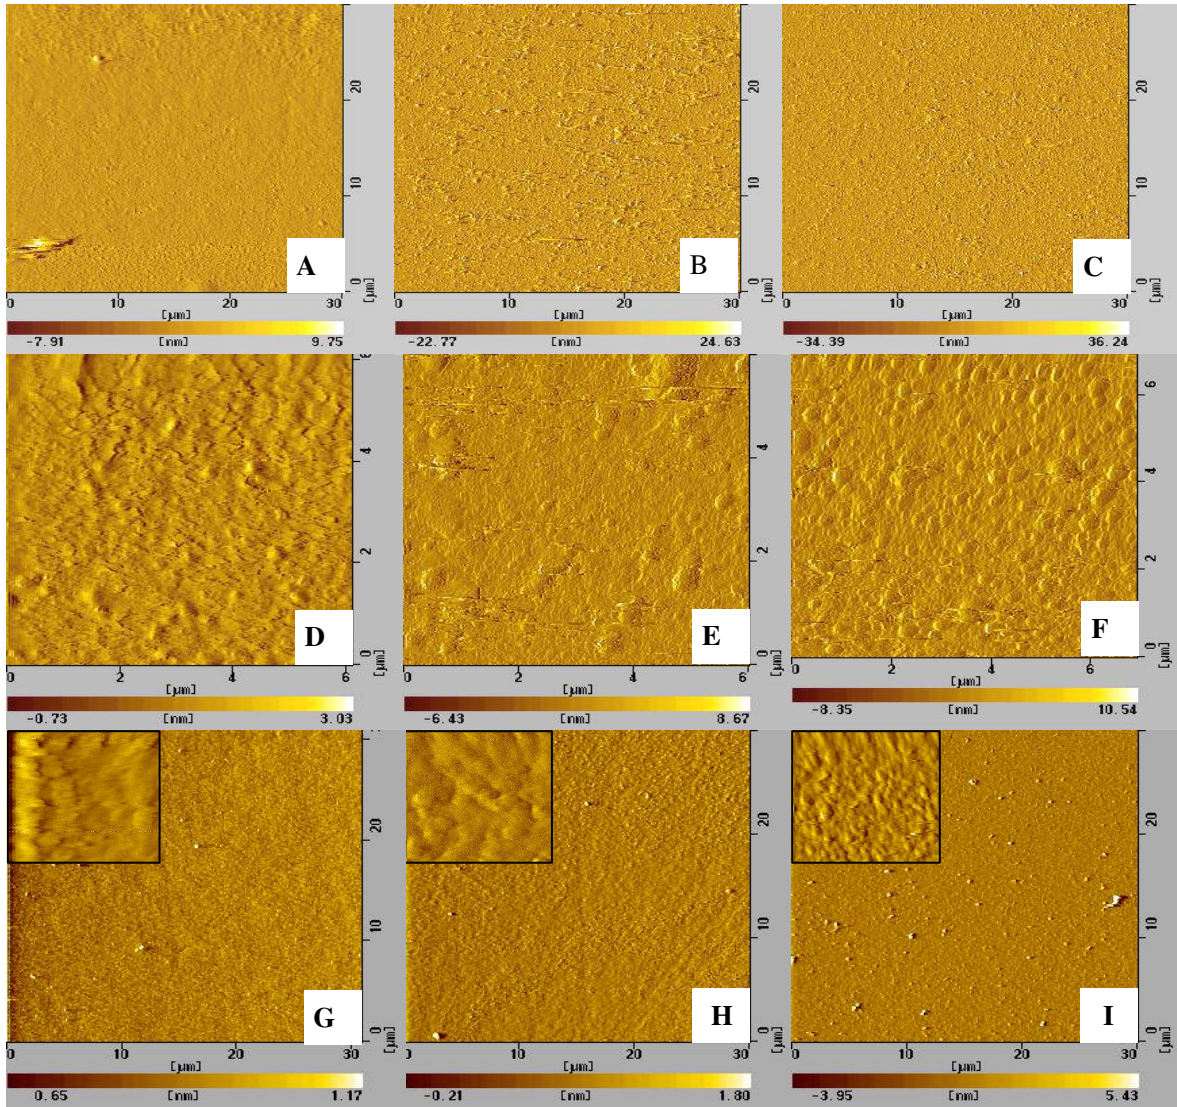

Supplement: Supplementary file 1 [file 4618780]
